# Supplementary material for: The Role of Hyperthermia in Potentiation of Anti-Angiogenic Effect of Cisplatin and Resveratrol in Mice Bearing Solid Form of Ehrlich Ascites Tumour
Source: MDPI journal article supplement (doi:10.3390/ijms241311073), 2023-07-04
Supplement: s1 [file s1]

**Table S1.** Kaplan-Meier analysis of mice bearing solid form of EAT treated with resveratrol, cisplatin and their combination in physiological and hyperthermic conditions between all experimental groups.

| Experimental group <sup>a</sup> | Kaplan-Meier analysis (log-rank test) |              |         |          |         |          |           |                |
|---------------------------------|---------------------------------------|--------------|---------|----------|---------|----------|-----------|----------------|
|                                 | Control                               | Control + HT | Res     | Res + HT | Cis     | Cis + HT | Res + Cis | Res + Cis + HT |
| Control                         | -                                     |              |         |          |         |          |           |                |
| Control + HT                    | 0.1093                                | -            |         |          |         |          |           |                |
| Res                             | 0.00933                               | 0.03685      | -       |          |         |          |           |                |
| Res + HT                        | 0.00309                               | 0.00659      | 0.8969  | -        |         |          |           |                |
| Cis                             | 0.08076                               | 0.2149       | 0.8710  | 0.70502  | -       |          |           |                |
| Cis + HT                        | 0.00541                               | 0.01821      | 0.09024 | 0.13948  | 0.14906 | -        |           |                |
| Res + Cis                       | 0.01241                               | 0.06584      | 0.50451 | 0.12846  | 0.95195 | 0,32635  | -         |                |
| Res + Cis + HT                  | 0.00233                               | 0.00506      | 0.04231 | 0.02158  | 0.1830  | 0.68082  | 0.6316    | -              |

<sup>a</sup>After subcutaneous (sc) injection of 1x10<sup>6</sup> EAT cells, mice (N=10 per group) were treated with the dose of 50 mg/kg resveratrol during 5 consecutive days starting from the second day after injection, while cisplatin was injected intraperitoneally (ip) at a dose of 2.5 mg/kg on days 10 and 12, and at a dose of 5 mg/kg on day 15. Groups treated with hyperthermia were exposed to system hyperthermia lasting for 15 minutes at the temperature of 41 °C. Survival rates were calculated using the Kaplan-Meier method and comparison between the survival curves was made by log-rank test ( $\alpha = 5\%$ ).

Abbreviations: Res - resveratrol solution at a dose of 50 mg/kg; Cis - cisplatin at a dose of 2.5 and 5 mg/kg; Res + Cis - resveratrol solution at a dose of 50 mg/kg and cisplatin at a dose of 2.5 and 5 mg/kg; HT - hyperthermia; %ILS (increased life span %) =  $(T-C)/C \times 100$  .
